# Supplementary material for: The impact of COVID-19 and control measures on public health in Thailand, 2020
Source: PeerJ. 2022 Feb 16;10:e12960. doi: 10.7717/peerj.12960 (PMC8857899; doi:10.7717/peerj.12960)
Supplement: Supplemental Information 2 — The COVID-19 timelines in the year 2020, other viral infections (included dengue infection), suicidal behavior, and road accident incidences and fatalities. [file peerj-10-12960-s002.xlsx]

## Sheet: COVID-19 timeline
Column1.Date	Column1.NewConfirmed	Column1.NewRecovered	Column1.NewHospitalized	Column1.NewDeaths	Column1.Confirmed	Column1.Recovered	Column1.Hospitalized	Column1.Deaths	Indigenous	SQ	Illegally immigrant	Screenin at the entry	Myanmar worker (Active case detection)		Note
01/01/2020	0	0	0	0	0	0	0	0	0	0
01/02/2020	0	0	0	0	0	0	0	0	0	0
01/03/2020	0	0	0	0	0	0	0	0	0	0					Initiated thermoscan device for screening
01/04/2020	0	0	0	0	0	0	0	0	0	0
01/05/2020	0	0	0	0	0	0	0	0	0	0
01/06/2020	0	0	0	0	0	0	0	0	0	0
01/07/2020	0	0	0	0	0	0	0	0	0	0
01/08/2020	0	0	0	0	0	0	0	0	0	0					First case entering to TH, PUI Dx at airport. Screening to all international flight
01/09/2020	0	0	0	0	0	0	0	0	0	0
01/10/2020	0	0	0	0	0	0	0	0	0	0
01/11/2020	0	0	0	0	0	0	0	0	0	0
01/12/2020	1	0	1	0	1	0	1	0	1	0					First case from PUI at Airport
01/13/2020	0	0	0	0	1	0	1	0	0	0
01/14/2020	0	0	0	0	1	0	1	0	0	0
01/15/2020	0	0	0	0	1	0	1	0	0	0
01/16/2020	0	0	0	0	1	0	1	0	0	0
01/17/2020	1	0	1	0	2	0	2	0	1	0					Second case from Chinese
01/18/2020	0	1	-1	0	2	1	1	0	0	0
01/19/2020	0	0	0	0	2	1	1	0	0	0
01/20/2020	0	0	0	0	2	1	1	0	0	0
01/21/2020	0	1	-1	0	2	2	0	0	0	0
01/22/2020	2	0	2	0	4	2	2	0	2	0					Activated EOC. First case in Thai people returned from Wuhan
01/23/2020	0	0	0	0	4	2	2	0	0	0
01/24/2020	1	1	0	0	5	3	2	0	1	0
01/25/2020	1	0	1	0	6	3	3	0	1	0
01/26/2020	2	3	-1	0	8	6	2	0	2	0
01/27/2020	0	0	0	0	8	6	2	0	0	0					The Thai Prime Minister promote the EOC to be at the ministerial level
01/28/2020	6	0	6	0	14	6	8	0	6	0
01/29/2020	0	0	0	0	14	6	8	0	0	0
01/30/2020	0	1	-1	0	14	7	7	0	0	0
01/31/2020	5	1	4	0	19	8	11	0	5	0					First domestic case (Taxi driver)
02/01/2020	0	0	0	0	19	8	11	0	0	0
02/02/2020	0	1	-1	0	19	9	10	0	0	0
02/03/2020	0	0	0	0	19	9	10	0	0	0
02/04/2020	6	1	5	0	25	10	15	0	6	0					Inception SQ. Thai returned from Wuhan
02/05/2020	0	0	0	0	25	10	15	0	0	0
02/06/2020	0	0	0	0	25	10	15	0	0	0
02/07/2020	0	0	0	0	25	10	15	0	0	0
02/08/2020	7	0	7	0	32	10	22	0	6	1					First case in SQ
02/09/2020	0	1	-1	0	32	11	21	0	0	0
02/10/2020	0	0	0	0	32	11	21	0	0	0
02/11/2020	1	0	1	0	33	11	22	0	1	0
02/12/2020	0	0	0	0	33	11	22	0	0	0
02/13/2020	0	0	0	0	33	11	22	0	0	0
02/14/2020	0	0	0	0	33	11	22	0	0	0					Department of Health recommended fabric facemask
02/15/2020	1	2	-1	0	34	13	21	0	1	0
02/16/2020	0	2	-2	0	34	15	19	0	0	0
02/17/2020	1	0	1	0	35	15	20	0	1	0
02/18/2020	0	0	0	0	35	15	20	0	0	0
02/19/2020	0	0	0	0	35	15	20	0	0	0
02/20/2020	0	2	-2	0	35	17	18	0	0	0
02/21/2020	0	2	-2	0	35	19	16	0	0	0
02/22/2020	0	1	-1	0	35	20	15	0	0	0
02/23/2020	0	1	-1	0	35	21	14	0	0	0
02/24/2020	0	0	0	0	35	21	14	0	0	0
02/25/2020	2	1	1	0	37	22	15	0	2	0					Entertainment venues cluster
02/26/2020	3	2	1	0	40	24	16	0	3	0
02/27/2020	0	0	0	0	40	24	16	0	0	0
02/28/2020	1	4	-3	0	41	28	13	0	1	0
02/29/2020	1	0	1	0	42	28	14	0	1	0					Declaration the COVID-19 is a dangerous communicable disease by the act
03/01/2020	0	2	-3	1	42	30	11	1	0	0					First fatal case of COVID-19 in Thailand
03/02/2020	1	1	0	0	43	31	11	1	1	0
03/03/2020	0	0	0	0	43	31	11	1	0	0					Thai workers returned from South Korea
03/04/2020	0	0	0	0	43	31	11	1	0	0
03/05/2020	4	0	4	0	47	31	15	1	4	0
03/06/2020	1	0	1	0	48	31	16	1	1	0
03/07/2020	2	0	2	0	50	31	18	1	2	0					Imperative a state quarantine in Thai workers from South Korea
03/08/2020	0	2	-2	0	50	33	16	1	0	0
03/09/2020	0	0	0	0	50	33	16	1	0	0					Confirmed cases from entertainment venues cluster
03/10/2020	3	0	3	0	53	33	19	1	3	0
03/11/2020	6	1	5	0	59	34	24	1	6	0					WHO declare the COVID-19 as a Pandemic. Confirmed cases from Boxing stadium cluster
03/12/2020	11	1	10	0	70	35	34	1	11	0
03/13/2020	5	0	5	0	75	35	39	1	5	0
03/14/2020	7	0	7	0	82	35	46	1	7	0
03/15/2020	32	2	30	0	114	37	76	1	32	0					Contact tracing of 132 persons from Dakwah Pilgrimage
03/16/2020	33	1	32	0	147	38	108	1	33	0					Revocation of Thai's New Year (Songkran festival) on 13 – 15 April.
03/17/2020	30	3	27	0	177	41	135	1	30	0					The cabinet of Thailand announce the Social distancing measure
03/18/2020	35	1	34	0	212	42	169	1	35	0					Imperative closure of entertainment and sporting venues. Social distancing initiation
03/19/2020	60	0	60	0	272	42	229	1	60	0
03/20/2020	50	1	49	0	322	43	278	1	50	0
03/21/2020	89	1	88	0	411	44	366	1	89	0					Closure of schools and universities
03/22/2020	188	1	187	0	599	45	553	1	188	0					Bangkok's lockdown
03/23/2020	122	7	115	0	721	52	668	1	122	0
03/24/2020	106	5	98	3	827	57	766	4	106	0
03/25/2020	107	13	94	0	934	70	860	4	107	0
03/26/2020	111	18	93	0	1045	88	953	4	111	0					Thailand's emergency decree. Closure of point of entry into the Kingdom at 11:00 (TH border)
03/27/2020	91	9	81	1	1136	97	1034	5	91	0
03/28/2020	109	3	105	1	1245	100	1139	6	109	0
03/29/2020	143	11	131	1	1388	111	1270	7	143	0
03/30/2020	136	16	118	2	1524	127	1388	9	136	0
03/31/2020	127	215	-89	1	1651	342	1299	10	127	0
04/01/2020	120	74	44	2	1771	416	1343	12	120	0
04/02/2020	104	89	12	3	1875	505	1355	15	104	0
04/03/2020	103	76	23	4	1978	581	1378	19	103	0					Nationwide curfew (22:00-04:00). Suspension of international flights
04/04/2020	89	31	57	1	2067	612	1435	20	89	0					Enforcement of state quarantine. Extension of school suspended
04/05/2020	102	62	37	3	2169	674	1472	23	102	0
04/06/2020	51	119	-71	3	2220	793	1401	26	51	0					The return of 76 male Muslim pilgrims from a mass religious meeting in Indonesia
04/07/2020	38	31	6	1	2258	824	1407	27	38	0
04/08/2020	111	64	44	3	2369	888	1451	30	69	42
04/09/2020	54	52	0	2	2423	940	1451	32	49	5
04/10/2020	50	73	-24	1	2473	1013	1427	33	50	0
04/11/2020	45	122	-79	2	2518	1135	1348	35	36	9
04/12/2020	33	83	-53	3	2551	1218	1295	38	31	2					Songkran's festival period (revoked on this year). Alcoholic beverage trade prohibition
04/13/2020	28	70	-44	2	2579	1288	1251	40	25	3
04/14/2020	34	117	-84	1	2613	1405	1167	41	33	1
04/15/2020	30	92	-64	2	2643	1497	1103	43	29	1
04/16/2020	29	96	-70	3	2672	1593	1033	46	29	0
04/17/2020	28	96	-69	1	2700	1689	964	47	28	0
04/18/2020	33	98	-65	0	2733	1787	899	47	31	2					The return of Thai workers from Malaysia
04/19/2020	32	141	-109	0	2765	1928	790	47	28	4
04/20/2020	27	71	-44	0	2792	1999	746	47	26	1
04/21/2020	19	109	-91	1	2811	2108	655	48	19	0
04/22/2020	15	244	-230	1	2826	2352	425	49	15	0
04/23/2020	13	78	-66	1	2839	2430	359	50	13	0
04/24/2020	15	60	-45	0	2854	2490	314	50	15	0
04/25/2020	53	57	-5	1	2907	2547	309	51	11	42					Detection of 42 cases in an immigrant detention centre in Songkhla Province
04/26/2020	15	47	-32	0	2922	2594	277	51	10	5
04/27/2020	9	15	-7	1	2931	2609	270	52	7	2
04/28/2020	7	43	-38	2	2938	2652	232	54	7	0
04/29/2020	9	13	-4	0	2947	2665	228	54	9	0
04/30/2020	7	22	-15	0	2954	2687	213	54	4	3
05/01/2020	6	32	-26	0	2960	2719	187	54	6	0
05/02/2020	6	13	-7	0	2966	2732	180	54	4	2
05/03/2020	3	7	-4	0	2969	2739	176	54	2	1					First phase easing, including cancellation of alcoholic beverage trade prohibition
05/04/2020	18	1	17	0	2987	2740	193	54	0	18
05/05/2020	1	7	-6	0	2988	2747	187	54	1	0
05/06/2020	1	14	-14	1	2989	2761	173	55	0	1
05/07/2020	3	11	-8	0	2992	2772	165	55	1	2
05/08/2020	8	12	-4	0	3000	2784	161	55	3	5
05/09/2020	4	3	0	1	3004	2787	161	56	4	0
05/10/2020	5	7	-2	0	3009	2794	159	56	2	3
05/11/2020	6	2	4	0	3015	2796	163	56	6	0
05/12/2020	2	2	0	0	3017	2798	163	56	2	0
05/13/2020	0	46	-46	0	3017	2844	117	56	0	0
05/14/2020	1	6	-5	0	3018	2850	112	56	1	0
05/15/2020	7	4	3	0	3025	2854	115	56	0	7
05/16/2020	0	1	-1	0	3025	2855	114	56	0	0
05/17/2020	3	1	2	0	3028	2856	116	56	0	3					Second phase easing, shorten a curfew period (23:00-04:00), reopening a shopping centre and specific businesses
05/18/2020	3	1	2	0	3031	2857	118	56	3	0
05/19/2020	2	0	2	0	3033	2857	120	56	2	0
05/20/2020	1	31	-30	0	3034	2888	90	56	0	1
05/21/2020	3	9	-6	0	3037	2897	84	56	2	1
05/22/2020	0	13	-13	0	3037	2910	71	56	0	0
05/23/2020	3	6	-3	0	3040	2916	68	56	1	2
05/24/2020	0	5	-5	0	3040	2921	63	56	0	0
05/25/2020	2	7	-6	1	3042	2928	57	57	1	1	0	0	0		Last case on the first wave
05/26/2020	3	1	2	0	3045	2929	59	57	0	3	0	0	0
05/27/2020	9	2	7	0	3054	2931	66	57	0	9	0	0	0
05/28/2020	11	14	-3	0	3065	2945	63	57	0	11	0	0	0
05/29/2020	11	0	11	0	3076	2945	74	57	0	11	0	0	0
05/30/2020	1	16	-15	0	3077	2961	59	57	0	1	0	0	0
05/31/2020	4	2	2	0	3081	2963	61	57	0	4	0	0	0
06/01/2020	1	2	-1	0	3082	2965	60	57	0	1	0	0	0		Third phase easing
06/02/2020	1	1	-1	1	3083	2966	59	58	0	1	0	0	0
06/03/2020	1	2	-1	0	3084	2968	58	58	0	1	0	0	0
06/04/2020	17	0	17	0	3101	2968	75	58	0	17	0	0	0
06/05/2020	1	3	-2	0	3102	2971	73	58	0	1	0	0	0
06/06/2020	2	0	2	0	3104	2971	75	58	0	2	0	0	0
06/07/2020	8	1	7	0	3112	2972	82	58	0	8	0	0	0
06/08/2020	7	1	6	0	3119	2973	88	58	0	7	0	0	0
06/09/2020	2	0	2	0	3121	2973	90	58	0	2	0	0	0
06/10/2020	4	8	-4	0	3125	2981	86	58	0	4	0	0	0
06/11/2020	0	6	-6	0	3125	2987	80	58	0	0	0	0	0
06/12/2020	4	0	4	0	3129	2987	84	58	0	4	0	0	0
06/13/2020	5	0	5	0	3134	2987	89	58	0	5	0	0	0
06/14/2020	1	0	1	0	3135	2987	90	58	0	1	0	0	0
06/15/2020	0	0	0	0	3135	2987	90	58	0	0	0	0	0		Fourth phase easing
06/16/2020	0	6	-6	0	3135	2993	84	58	0	0	0	0	0
06/17/2020	0	3	-3	0	3135	2996	81	58	0	0	0	0	0
06/18/2020	6	1	5	0	3141	2997	86	58	0	6	0	0	0
06/19/2020	5	11	-6	0	3146	3008	80	58	0	5	0	0	0
06/20/2020	1	10	-9	0	3147	3018	71	58	0	1	0	0	0
06/21/2020	1	0	1	0	3148	3018	72	58	0	1	0	0	0
06/22/2020	3	4	-1	0	3151	3022	71	58	0	3	0	0	0
06/23/2020	5	1	4	0	3156	3023	75	58	0	5	0	0	0
06/24/2020	1	3	-2	0	3157	3026	73	58	0	1	0	0	0
06/25/2020	1	12	-11	0	3158	3038	62	58	0	1	0	0	0
06/26/2020	4	2	2	0	3162	3040	64	58	0	4	0	0	0
06/27/2020	0	13	-13	0	3162	3053	51	58	0	0	0	0	0
06/28/2020	0	0	0	0	3162	3053	51	58	0	0	0	0	0
06/29/2020	7	0	7	0	3169	3053	58	58	0	7	0	0	0
06/30/2020	2	3	-1	0	3171	3056	57	58	0	2	0	0	0
07/01/2020	2	3	-1	0	3173	3059	56	58	0	2	0	0	0		Fifth phase easing, including a school opening
07/02/2020	6	0	6	0	3179	3059	62	58	0	6	0	0	0
07/03/2020	1	7	-6	0	3180	3066	56	58	0	1	0	0	0
07/04/2020	5	0	5	0	3185	3066	61	58	0	5	0	0	0
07/05/2020	5	5	0	0	3190	3071	61	58	0	5	0	0	0
07/06/2020	5	1	4	0	3195	3072	65	58	0	5	0	0	0
07/07/2020	0	0	0	0	3195	3072	65	58	0	0	0	0	0
07/08/2020	2	2	0	0	3197	3074	65	58	0	2	0	0	0
07/09/2020	5	11	-6	0	3202	3085	59	58	0	5	0	0	0
07/10/2020	0	2	-2	0	3202	3087	57	58	0	0	0	0	0
07/11/2020	14	1	13	0	3216	3088	70	58	0	14	0	0	0
07/12/2020	1	0	1	0	3217	3088	71	58	0	1	0	0	0
07/13/2020	3	2	1	0	3220	3090	72	58	0	3	0	0	0
07/14/2020	7	1	6	0	3227	3091	78	58	0	7	0	0	0
07/15/2020	5	1	4	0	3232	3092	82	58	0	5	0	0	0
07/16/2020	4	3	1	0	3236	3095	83	58	0	4	0	0	0
07/17/2020	3	1	2	0	3239	3096	85	58	0	3	0	0	0
07/18/2020	7	0	7	0	3246	3096	92	58	0	7	0	0	0
07/19/2020	3	0	3	0	3249	3096	95	58	0	3	0	0	0
07/20/2020	1	0	1	0	3250	3096	96	58	0	1	0	0	0
07/21/2020	5	9	-4	0	3255	3105	92	58	0	5	0	0	0
07/22/2020	6	0	6	0	3261	3105	98	58	0	6	0	0	0
07/23/2020	8	0	8	0	3269	3105	106	58	0	8	0	0	0
07/24/2020	10	2	8	0	3279	3107	114	58	0	10	0	0	0
07/25/2020	3	2	1	0	3282	3109	115	58	0	3	0	0	0
07/26/2020	9	0	9	0	3291	3109	124	58	0	9	0	0	0
07/27/2020	4	2	2	0	3295	3111	126	58	0	4	0	0	0		Songkran replacement holiday on 27 July 2020 (Holiday period 25 – 28 July 2020)
07/28/2020	2	0	2	0	3297	3111	128	58	0	2	0	0	0
07/29/2020	1	0	1	0	3298	3111	129	58	0	1	0	0	0
07/30/2020	6	0	6	0	3304	3111	135	58	0	6	0	0	0
07/31/2020	6	14	-8	0	3310	3125	127	58	0	6	0	0	0
08/01/2020	2	10	-8	0	3312	3135	119	58	0	2	0	0	0
08/02/2020	5	7	-2	0	3317	3142	117	58	0	5	0	0	0
08/03/2020	3	0	3	0	3320	3142	120	58	0	3	0	0	0
08/04/2020	1	0	1	0	3321	3142	121	58	0	1	0	0	0
08/05/2020	7	2	5	0	3328	3144	126	58	0	7	0	0	0
08/06/2020	2	4	-2	0	3330	3148	124	58	0	2	0	0	0
08/07/2020	15	0	15	0	3345	3148	139	58	0	15	0	0	0
08/08/2020	3	2	1	0	3348	3150	140	58	0	3	0	0	0
08/09/2020	3	1	2	0	3351	3151	142	58	0	3	0	0	0
08/10/2020	0	9	-9	0	3351	3160	133	58	0	0	0	0	0
08/11/2020	0	3	-3	0	3351	3163	130	58	0	0	0	0	0
08/12/2020	5	6	-1	0	3356	3169	129	58	0	5	0	0	0
08/13/2020	3	0	3	0	3359	3169	132	58	0	3	0	0	0
08/14/2020	17	4	13	0	3376	3173	145	58	0	17	0	0	0
08/15/2020	0	20	-20	0	3376	3193	125	58	0	0	0	0	0
08/16/2020	1	1	0	0	3377	3194	125	58	0	1	0	0	0
08/17/2020	1	0	1	0	3378	3194	126	58	0	1	0	0	0
08/18/2020	3	4	-1	0	3381	3198	125	58	0	3	0	0	0
08/19/2020	1	1	0	0	3382	3199	125	58	0	1	0	0	0
08/20/2020	7	19	-12	0	3389	3218	113	58	0	7	0	0	0
08/21/2020	1	1	0	0	3390	3219	113	58	0	1	0	0	0
08/22/2020	0	1	-1	0	3390	3220	112	58	0	0	0	0	0
08/23/2020	5	1	4	0	3395	3221	116	58	0	5	0	0	0
08/24/2020	2	1	1	0	3397	3222	117	58	0	2	0	0	0
08/25/2020	5	7	-2	0	3402	3229	115	58	0	5	0	0	0
08/26/2020	1	8	-7	0	3403	3237	108	58	0	1	0	0	0
08/27/2020	1	0	1	0	3404	3237	109	58	0	1	0	0	0
08/28/2020	6	0	6	0	3410	3237	115	58	0	6	0	0	0
08/29/2020	1	5	-4	0	3411	3242	111	58	0	1	0	0	0
08/30/2020	0	10	-10	0	3411	3252	101	58	0	0	0	0	0
08/31/2020	1	0	1	0	3412	3252	102	58	0	1	0	0	0
09/01/2020	5	22	-17	0	3417	3274	85	58	0	5	0	0	0
09/02/2020	8	0	8	0	3425	3274	93	58	0	8	0	0	0
09/03/2020	2	3	-1	0	3427	3277	92	58	0	2	0	0	0		The Civil Aviation Authority of Thailand allow the airliner can services food, drink and sovernior in the airplane. The passenger can take off the face mask on the airplane only in the case of eat/drink.
09/04/2020	4	0	4	0	3431	3277	96	58	1	3	0	0	0		First case after 100 days. DJ, incarcerated.	Songkran replacement holiday on 04 and 07 September 2020 (Holiday period 04 – 07 September 2020)
09/05/2020	7	2	5	0	3438	3279	101	58	0	7	0	0	0
09/06/2020	6	2	4	0	3444	3281	105	58	0	6	0	0	0
09/07/2020	1	0	1	0	3445	3281	106	58	0	1	0	0	0
09/08/2020	1	3	-2	0	3446	3284	104	58	0	1	0	0	0
09/09/2020	1	2	-1	0	3447	3286	103	58	0	1	0	0	0
09/10/2020	7	24	-17	0	3454	3310	86	58	0	7	0	0	0
09/11/2020	7	2	5	0	3461	3312	91	58	0	7	0	0	0
09/12/2020	5	0	5	0	3466	3312	96	58	0	5	0	0	0
09/13/2020	7	0	7	0	3473	3312	103	58	0	7	0	0	0
09/14/2020	2	0	2	0	3475	3312	105	58	0	2	0	0	0
09/15/2020	5	3	2	0	3480	3315	107	58	0	5	0	0	0
09/16/2020	10	1	9	0	3490	3316	116	58	0	10	0	0	0
09/17/2020	0	9	-9	0	3490	3325	107	58	0	0	0	0	0
09/18/2020	7	3	4	0	3497	3328	111	58	0	7	0	0	0
09/19/2020	3	10	-8	1	3500	3338	103	59	0	3	0	0	0
09/20/2020	6	4	2	0	3506	3340	107	59	0	6	0	0	0
09/21/2020	0	2	0	0	3506	3342	105	59	0	0	0	0	0
09/22/2020	5	1	4	0	3511	3343	109	59	0	5	0	0	0
09/23/2020	3	2	1	0	3514	3345	110	59	0	3	0	0	0
09/24/2020	2	8	-6	0	3516	3353	104	59	0	2	0	0	0
09/25/2020	3	7	-4	0	3519	3360	100	59	0	3	0	0	0
09/26/2020	3	2	1	0	3522	3362	101	59	0	3	0	0	0
09/27/2020	1	5	-4	0	3523	3367	97	59	0	1	0	0	0
09/28/2020	22	2	20	0	3545	3369	117	59	0	22	0	0	0
09/29/2020	14	1	13	0	3559	3370	130	59	0	14	0	0	0
09/30/2020	5	4	1	0	3564	3374	131	59	0	5	0	0	0
10/01/2020	5	5	0	0	3569	3379	131	59	0	5	0	0	0
10/02/2020	6	5	1	0	3575	3384	132	59	0	6	0	0	0
10/03/2020	8	2	6	0	3583	3386	138	59	0	8	0	0	0
10/04/2020	2	2	0	0	3585	3388	138	59	0	2	0	0	0
10/05/2020	5	2	3	0	3590	3390	141	59	0	5	0	0	0
10/06/2020	10	0	10	0	3600	3390	151	59	0	10	0	0	0
10/07/2020	15	1	14	0	3615	3391	165	59	0	15	0	0	0
10/08/2020	7	48	-41	0	3622	3439	124	59	0	7	0	0	0
10/09/2020	6	2	4	0	3628	3441	128	59	0	6	0	0	0
10/10/2020	6	4	2	0	3634	3445	130	59	0	6	0	0	0
10/11/2020	2	0	2	0	3636	3445	132	59	0	2	0	0	0
10/12/2020	5	9	-4	0	3641	3454	128	59	0	5	0	0	0
10/13/2020	2	3	-1	0	3643	3457	127	59	0	2	0	0	0
10/14/2020	9	0	9	0	3652	3457	136	59	0	9	0	0	0
10/15/2020	13	6	7	0	3665	3463	143	59	0	13	0	0	0
10/16/2020	4	4	0	0	3679	3478	142	59	0	4	0	0	0
10/17/2020	10	11	-1	0	3675	3474	142	59	2	8	0	0	0		Myanmar in Tak (Active case finding)
10/18/2020	7	3	4	0	3686	3481	146	59	3	4	0	0	0		Myanmar in Tak
10/19/2020	5	7	-2	0	3691	3488	144	59	0	5	0	0	0
10/20/2020	9	3	6	0	3700	3491	150	59	0	9	0	0	0
10/21/2020	9	4	5	0	3709	3495	155	59	0	9	0	0	0
10/22/2020	10	19	-9	0	3719	3514	146	59	0	10	0	0	0
10/23/2020	8	4	4	0	3727	3518	150	59	0	8	0	0	0
10/24/2020	4	11	-7	0	3731	3529	143	59	1	3	0	0	0		French, Koh Samui
10/25/2020	5	1	4	0	3736	3530	147	59	0	5	0	0	0
10/26/2020	7	13	-6	0	3743	3543	141	59	0	7	0	0	0
10/27/2020	3	8	-5	0	3746	3551	136	59	0	3	0	0	0
10/28/2020	13	10	3	0	3759	3561	139	59	0	13	0	0	0
10/29/2020	4	9	-5	0	3763	3570	134	59	0	4	0	0	0
10/30/2020	12	15	-3	0	3775	3585	131	59	0	12	0	0	0
10/31/2020	5	5	0	0	3780	3590	131	59	0	5	0	0	0
11/01/2020	4	2	2	0	3784	3592	133	59	0	4	0	0	0
11/02/2020	3	3	0	0	3787	3595	133	59	0	3	0	0	0
11/03/2020	10	10	0	0	3797	3605	133	59	0	10	0	0	0
11/04/2020	7	7	0	0	3804	3612	133	59	0	7	0	0	0
11/05/2020	6	11	-5	0	3810	3623	128	59	0	5	0	1	0		Screening at border. Myanmar driver, back to Tx in Myanmar
11/06/2020	8	16	-9	1	3818	3639	119	60	0	5	0	3	0		Screening at border. Myanmar driver, back to Tx in Myanmar
11/07/2020	12	5	7	0	3830	3644	126	60	1	9	0	2	0		Screening at border. Myanmar driver, back to Tx in Myanmar
11/08/2020	7	10	-3	0	3837	3654	123	60	0	6	0	1	0		Screening at border. Myanmar driver, back to Tx in Myanmar
11/09/2020	3	7	-4	0	3840	3661	119	60	0	3	0	0	0
11/10/2020	4	9	-5	0	3844	3670	114	60	1	3	0	0	0		BKK
11/11/2020	3	15	-12	0	3847	3685	102	60	0	2	0	1	0		Screeing at SVN airport, Thai from UK
11/12/2020	5	8	-3	0	3852	3693	99	60	0	5	0	0	0
11/13/2020	9	4	5	0	3861	3697	104	60	0	9	0	0	0
11/14/2020	5	10	-5	0	3866	3707	99	60	0	5	0	0	0
11/15/2020	8	8	0	0	3874	3715	99	60	0	8	0	0	0
11/16/2020	1	6	-5	0	3875	3721	94	60	0	1	0	0	0
11/17/2020	3	3	0	0	3878	3724	94	60	0	2	0	1	0		Screening at the seaport, Philipins
11/18/2020	2	5	-3	0	3880	3729	91	60	0	2	0	0	0
11/19/2020	8	13	-5	0	3888	3742	86	60	0	8	0	0	0		Holiday (19-20 Nov 2020) by the Cabinet resolution
11/20/2020	4	3	1	0	3892	3745	87	60	0	4	0	0	0
11/21/2020	10	11	-1	0	3920	3766	94	60	0	10	0	0	0
11/22/2020	11	5	6	0	3910	3755	95	60	1	9	1	0	0		Tak (Myanmar in Refugee camp)
11/23/2020	7	5	2	0	3899	3750	89	60	0	7	0	0	0
11/24/2020	2	6	-4	0	3922	3772	90	60	0	2	0	0	0
11/25/2020	4	8	-4	0	3926	3780	86	60	0	4	0	0	0
11/26/2020	16	8	8	0	3942	3788	94	60	0	16	0	0	0
11/27/2020	19	2	17	0	3961	3790	111	60	0	19	0	0	0
11/28/2020	5	8	-3	0	3966	3798	108	60	0	4	1	0	0		Myanmar
11/29/2020	11	2	9	0	3977	3800	117	60	0	11	0	0	0
11/30/2020	21	3	18	0	3998	3803	135	60	0	19	2	0	0
12/01/2020	10	8	2	0	4008	3811	137	60	0	10	0	0	0
12/02/2020	18	11	7	0	4026	3822	144	60	0	17	1	0	0
12/03/2020	13	10	3	0	4039	3832	147	60	0	7	6	0	0
12/04/2020	14	7	7	0	4053	3839	154	60	1	13	0	0	0		Chiangrai
12/05/2020	19	9	10	0	4072	3848	164	60	2	13	3	1	0		Singburi, Chiangrai
12/06/2020	14	5	9	0	4086	3853	173	60	1	10	2	1	0		BKK, BNH
12/07/2020	21	15	6	0	4107	3868	179	60	0	21	0	0	0
12/08/2020	19	6	13	0	4126	3874	192	60	4	14	1	0	0		BKK (4), BNH
12/09/2020	25	6	19	0	4151	3880	211	60	0	25	0	0	0
12/10/2020	18	8	10	0	4169	3888	221	60	1	17	0	0	0		BKK, BNH
12/11/2020	11	15	-4	0	4180	3903	217	60	0	11	0	0	0		King Rama IX's Birthday repleacment
12/12/2020	12	12	0	0	4192	3915	217	60	0	12	0	0	0
12/13/2020	17	8	9	0	4209	3923	226	60	0	12	0	5	0
12/14/2020	28	17	11	0	4237	3940	237	60	1	27	0	0	0		BKK, BNH
12/15/2020	9	9	0	0	4246	3949	237	60	0	9	0	0	0
12/16/2020	15	28	-13	0	4261	3977	224	60	0	15	0	0	0
12/17/2020	20	12	8	0	4281	3989	232	60	0	20	0	0	0		First case of Entertainment venues and restaurants
12/18/2020	16	16	0	0	4297	4005	232	60	1	15	0	0	0		First case of Shrimp cluster
12/19/2020	34	19	15	0	4331	4024	247	60	12	22	0	0	0		First case of Big Bike cluster (related to Shrimp market) (perhabs exposed on 9 Dec 2020)
12/20/2020	576	17	559	0	4907	4041	806	60	19	41	0	0	516
12/21/2020	382	12	370	0	5289	4053	1176	60	14	8	0	0	360
12/22/2020	427	25	402	0	5716	4078	1578	60	16	14	0	0	397
12/23/2020	46	17	29	0	5762	4095	1607	60	39	7	0	0	0
12/24/2020	67	21	46	0	5829	4116	1653	60	58	8	1	0	0		First case of illegal gambling den cluster
12/25/2020	81	21	60	0	5910	4137	1713	60	37	9	0	0	35
12/26/2020	110	15	95	0	6020	4152	1808	60	110	16	0	0	30
12/27/2020	121	9	112	0	6141	4161	1920	60	121	8	0	1	18		Screening at border. Myanmar driver, back to Tx in Myanmar
12/28/2020	144	19	125	0	6285	4180	2045	60	115	15	0	0	14
12/29/2020	155	4	150	1	6440	4184	2195	61	155	10	0	0	11		Fatal case from underlying diseases
12/30/2020	250	28	222	0	6690	4212	2417	61	241	8	0	1	0		Send back 1 case from screening at the entry to the origin country
12/31/2020	194	28	166	0	6884	4240	2583	61	172	13	0	0	9
01/01/2021	279	33	244	2	7163	4273	2827	63	257	6	0	0	16
01/02/2021	216	26	189	1	7379	4299	3016	64	182	2	0	0	32
01/03/2021	315	38	277	0	7694	4337	3293	64	274	21	0	0	20
01/04/2021	745	15	729	1	8439	4352	4022	65	152	16	0	0	577
01/05/2021	527	45	482	0	8966	4397	4504	65	82	6	0	0	439

## Sheet: Viral infections
Weeks	Week 2019	Week 2020		Flu 2019	Flu 2020	RSV 2019	RSV 2020	Rota 2019	Rota 2020	Noro 2019	Noro 2020
1	01Jan-05Jan	01Jan-04Jan		6	16	0	3	3	13	0	3
2	06Jan-12Jan	05Jan-11Jan		21	31	1	1	4	35	3	12
3	13Jan-19Jan	12Jan-18Jan		36	43	1	0	7	21	10	6
4	20Jan-26Jan	19Jan-25Jan		59	52	1	2	1	16	7	1
5	27Jan-02Feb	26Jan-01Feb		45	56	3	1	0	8	2	4
6	03Feb-09Feb	02Feb-08Feb		22	37	2	0	0	15	0	11
7	10Feb-16Feb	09Feb-15Feb		17	13	0	0	0	4	1	8
8	17Feb-23Feb	16Feb-22Feb		42	19	1	1	0	8	4	5
9	24Feb-02Mar	23Feb-29Feb		57	9	1	0	0	16	1	0
10	03Mar-09Mar	01Mar-07Mar		35	5	2	0	0	17	0	2
11	10Mar-16Mar	08Mar-14Mar		37	6	0	0	0	5	0	1
12	17Mar-23Mar	15Mar-21Mar		33	0	0	0	0	4	1	1
13	24Mar-30Mar	22Mar-28Mar		20	0	1	1	0	0	3	0
14	31Mar-06Apr	29Mar-04Apr		31	0	1	0	0	0	0	0
15	07Apr-13Apr	05Apr-11Apr		28	0	1	0	0	0	0	0
16	14Apr-20Apr	12Apr-18Apr		29	0	1	0	1	0	0	0
17	21Apr-27Apr	19Apr-25Apr		20	0	0	0	0	0	0	0
18	28Apr-04May	26Apr-02May		21	0	2	0	0	2	0	2
19	05May-11May	03May-09May		11	0	0	0	1	0	1	0
20	12May-18May	10May-16May		7	0	0	0	0	0	0	0
21	19May-25May	17May-23May		1	0	0	0	0	1	1	1
22	26May-01Jun	24May-30May		9	0	0	0	0	0	1	0
23	02Jun-08Jun	31May-06Jun		8	0	2	0	0	0	0	0
24	09Jun-15Jun	07Jun-13Jun		6	0	1	0	1	0	2	0
25	16Jun-22Jun	14Jun-20Jun		5	0	0	0	0	2	1	0
26	23Jun-29Jun	21Jun-27Jun		6	0	3	0	0	0	0	0
27	30Jun-06Jul	28Jun-04Jul		9	0	3	0	0	0	0	0
28	07Jul-13Jul	05Jul-11Jul		10	0	2	0	0	0	0	0
29	14Jul-20Jul	12Jul-18Jul		15	0	1	0	0	1	0	0
30	21Jul-27Jul	19Jul-25Jul		9	0	8	0	1	0	0	0
31	28Jul-03Aug	26Jul-01Aug		14	0	4	0	0	0	5	0
32	04Aug-10Aug	02Aug-08Aug		9	0	6	0	0	0	1	0
33	11Aug-17Aug	09Aug-15Aug		12		11
34	18Aug-24Aug	16Aug-22Aug		10		9
35	25Aug-31Aug	23Aug-29Aug		6		7
36	1Sep-7Sep	30Aug-05Sep		23		9
37	8Sep-14Sep	06Sep-12Sep		47		7
38	15Sep-21Sep	13Sep-19Sep		56		15
39	22Sep-28Sep	20Sep-26Sep		65		7
40	29Sep-05Oct	27Sep-03Oct
41	06Oct-12Oct	04Oct-10Oct
42	13Oct-19Oct	11Oct-17Oct
43	20Oct-26Oct	18Oct-24Oct
44	27Oct-02Nov	25Oct-31Oct

## Sheet: Dengue
Weeks	Week 2019	Week 2020	DF 2019	DF.Cul2019	DHF 2019	DHF.Cul2019	DSS 2019	DSS.Cul2019	DEN 2019	DEN.Cul2020	DF 2020	DF.Cul2020	DHF 2020	DHF.Cul2020	DSS 2020	DSS.Cul2020	DEN 2020	DEN.Cul2019
1	01Jan-05Jan	01Jan-04Jan	435		272		8		715		268		123		6		397
2	06Jan-12Jan	05Jan-11Jan	621	1056	334	606	9	17	964	1679	401	669	268	391	6	12	675	1072
3	13Jan-19Jan	12Jan-18Jan	722	1778	427	1033	6	23	1155	2834	337	1006	185	576	3	15	525	1597
4	20Jan-26Jan	19Jan-25Jan	694	2472	421	1454	19	42	1134	3968	517	1523	305	881	3	18	825	2422
5	27Jan-02Feb	26Jan-01Feb	783	3255	431	1885	9	51	1223	5191	574	2097	278	1159	9	27	861	3283
6	03Feb-09Feb	02Feb-08Feb	802	4057	484	2369	24	75	1310	6501	451	2548	218	1377	5	32	674	3957
7	10Feb-16Feb	09Feb-15Feb	539	4596	303	2672	7	82	849	7350	495	3043	266	1643	14	46	775	4732
8	17Feb-23Feb	16Feb-22Feb	1325	5921	360	3032	9	91	1694	9044	417	3460	219	1862	3	49	639	5371
9	24Feb-02Mar	23Feb-29Feb	325	6246	524	3556	21	112	870	9914	437	3897	286	2148	3	52	726	6097
10	03Mar-09Mar	01Mar-07Mar	868	7114	397	3953	15	127	1280	11194	334	4231	158	2306	0	52	492	6589
11	10Mar-16Mar	08Mar-14Mar	854	7968	488	4441	9	136	1351	12545	339	4570	198	2504	8	60	545	7134
12	17Mar-23Mar	15Mar-21Mar	738	8706	391	4832	3	139	1132	13677	303	4873	148	2652	7	67	458	7592
13	24Mar-30Mar	22Mar-28Mar	723	9429	365	5197	9	148	1097	14774	371	5244	182	2834	2	69	555	8147
14	31Mar-06Apr	29Mar-04Apr	545	9974	259	missed	12	160	816	15590	394	5638	191	3025	14	83	599	8746
15	07Apr-13Apr	05Apr-11Apr	689	10663	348	5804	8	168	1045	16635	395	6033	134	3159	0	83	529	9275
16	14Apr-20Apr	12Apr-18Apr	979	11642	473	6277	18	186	1470	18105	556	6589	256	3415	6	89	818	10093
17	21Apr-27Apr	19Apr-25Apr	864	12506	524	6801	10	196	1398	19503	564	7153	279	3694	2	91	845	10938
18	28Apr-04May	26Apr-02May	823	13329	392	7193	15	211	1230	20733	729	7882	262	3956	9	100	1000	11938
19	05May-11May	03May-09May	995	14324	462	7655	13	224	1470	22203	764	8646	295	4251	9	109	1068	13006
20	12May-18May	10May-16May	935	15259	473	8128	11	235	1419	23622	803	9449	318	4569	9	118	1130	14136
21	19May-25May	17May-23May	1839	17098	933	9061	36	271	2808	26430	900	10349	339	4908	10	128	1249	15385
22	26May-01Jun	24May-30May	1637	18735	698	9759	20	291	2355	28785	1142	11491	381	5289	16	144	1539	16924
23	02Jun-08Jun	31May-06Jun	2151	20886	887	10646	20	311	3058	31843	1184	12675	446	5735	14	158	1644	18568
24	09Jun-15Jun	07Jun-13Jun	2625	23511	979	missed	35	346	3639	35482	1466	14141	508	6243	20	178	1994	20562
25	16Jun-22Jun	14Jun-20Jun	3338	26849	1552	13177	30	376	4920	40402	1514	15655	549	6792	14	192	2077	22639
26	23Jun-29Jun	21Jun-27Jun	2890	29739	1352	14529	27	403	4269	44671	2196	17851	853	7645	20	212	3069	25708
27	30Jun-06Jul	28Jun-04Jul	3141	32880	1326	15855	36	439	4503	49174	1907	19758	659	8304	25	237	2591	28299
28	07Jul-13Jul	05Jul-11Jul	3245	36125	1246	17101	34	473	4525	53699	2256	22014	862	9166	21	258	3139	31438
29	14Jul-20Jul	12Jul-18Jul	3664	39789	1752	18853	52	525	5468	59167	2885	24899	1103	10269	24	282	4012	35450
30	21Jul-27Jul	19Jul-25Jul	3411	43200	1555	20408	26	551	4992	64159	1771	26670	768	11037	15	297	2554	38004
31	28Jul-03Aug	26Jul-01Aug	3507	46707	1356	21764	33	584	4896	69055	2340	29010	1040	12077	31	328	3411	41415
32	04Aug-10Aug	02Aug-08Aug	2982	49689	1232	22996	55	639	4269	73324	2232	31242	742	12819	14	342	2988	44403
33	11Aug-17Aug	09Aug-15Aug	2815	52504	1400	24396	36	675	4251	77575	2280	33522	1021	13840	34	376	3335	47738
34	18Aug-24Aug	16Aug-22Aug	2702	55206	1191	25587	32	707	3925	81500	2089	35611	808	14648	25	401	2922	50660
35	25Aug-31Aug	23Aug-29Aug	2720	57926	1269	26856	31	738	4020	85520	1592	37203	578	15226	15	416	2185	52845
36	1Sep-7Sep	30Aug-05Sep	2514	60440	1102	27958	21	759	3637	89157	1450	38653	691	15917	18	434	2159	55004
37	8Sep-14Sep	06Sep-12Sep	2619	63059	1198	29156	33	792	3850	93007	1753	40406	705	16622	14	448	2472	57476
38	15Sep-21Sep	13Sep-19Sep	2256	65315	1068	30224	38	830	3362	96369	1599	42005	754	17376	13	461	2366	59842
39	22Sep-28Sep	20Sep-26Sep	1562	66877	771	30995	12	842	2345	98714	1239	43244	567	17943	14	475	1820	61662
40	29Sep-05Oct	27Sep-03Oct	2554	69431	1240	32235	45	887	3839	102553	1102	44346	446	18389	10	485	1558	63220
41	06Oct-12Oct	04Oct-10Oct	1685	71116	932	33167	20	907	2637	105190	545	44891	74	18463	4	489	623	63843
42	13Oct-19Oct	11Oct-17Oct	1804	72920	984	34151	27	934	2815	108005	20073	64964	264	18727	14	503	1121	64964
43	20Oct-26Oct	18Oct-24Oct	2319	75239	1178	35329	33	967	3530	111535	-18290	46674	479	19206	13	516	1432	66396
44	27Oct-02Nov	25Oct-31Oct	1928	77167	971	36300	15	982	2914	114449	609	47283	272	19478	8	524	889	67285
45	03Nov-09Nov	01Nov-07Nov	1294	78461	704	37004	15	997	2013	116462	493	47776	250	19728	5	529	748	68033
46	10Nov-16Nov	08Nov-14Nov	1705	80166	876	37880	3	1000	2584	119046	467	48243	248	19976	2	531	717	68750
47	17Nov-23Nov	15Nov-21Nov	1750	81916	877	38757	23	1023	2650	121696	444	48687	156	20132	5	536	605	69355
48	24Nov-30Nov	22Nov-28Nov	1031	82947	577	39334	16	1039	1624	123320	-692	47995	-252	19880	-3	533	-947	68408
49	01Dec-07Dec	29Nov-05Dec	1148	84095	751	40085	16	1055	1915	125235	1452	49447	560	20440	9	542	2021	70429
50	08Dec-14Dec	06Dec-12Dec	838	84933	624	40709	11	1066	1473	126708	273	49720	112	20552	7	549	392	70821
51	15Dec-21Dec	13Dec-19Dec	1129	86062	557	41266	7	1073	1693	128401	280	50000	106	20658	3	552	389	71210
52	22Dec-28Dec	20Dec-26Dec	356	86418	201	41467	6	1079	563	128964	42	50042	41	20699	0	552	82	71292
53	29Dec-31Dec	27Dec-31Dec	1448	87866	718	42185	27	1106	2193	131157

## Sheet: Sheet1
Week	KCMH 2019	KCMH 2020
1	11761	9159
2	27999	31153
3	27145	30177
4	28290	29180
5	26104	27314
6	27264	29367
7	28254	24811
8	23084	32105
9	29060	30670
10	25302	27374
11	28750	29252
12	27927	27451
13	26319	24212
14	28142	18785
15	18273	15676
16	15243	10956
17	31301	19734
18	29238	19610
19	18578	13624
20	28953	18082
21	24329	23055
22	30414	24769
23	22617	20529
24	29106	26500
25	28764	26793
26	30143	26726
27	26733	26707
28	29467	16097
29	17789	30485
30	27648	29251
31	23544	16387
32	30044	29658
33	23003	22462
34	30547	28117
35	29537	29146
36	29410	23632
37	28348	24121
38	28813	29602
39	28839	29796
40	29132	28307
41	30238	29052
42	23456	23866
43	25389	25698
44	30167	29753
45	27808	28939
46	29468	30522
47	29319	20773
48	29197	30877
49	24351	30956
50	23810	18622
51	31015	31216
52	30193	30691
53	158	15809

## Sheet: Road accidents
Weeks	Week 2019	Week 2020	Event 2020	Event.date	Accident_car_total 2019	Accident_car_00.01-04.00 2019	Accident_car_04.01-08.00 2019	Accident_car_08.01-12.00 2019	Accident_car_12.01-16.00 2019	Accident_car_16.01-20.00 2019	Accident_car_20.01-24.00 2019	Accident_car_total 2020	Accident_car_00.01-04.00 2020	Accident_car_04.01-08.00 2020	Accident_car_08.01-12.00 2020	Accident_car_12.01-16.00 2020	Accident_car_16.01-20.00 2020	Accident_car_20.01-24.00 2020	Accident_car.injur 2019	Accident_car_00.01-04.00.injur 2019	Accident_car_04.01-08.00.injur 2019	Accident_car_08.01-12.00.injur 2019	Accident_car_12.01-16.00.injur 2019	Accident_car_16.01-20.00.injur 2019	Accident_car_20.01-24.00.injur 2019	Accident_car.injur 2020	Accident_car_00.01-04.00.injur 2020	Accident_car_04.01-08.00.injur 2020	Accident_car_08.01-12.00.injur 2020	Accident_car_12.01-16.00.injur 2020	Accident_car_16.01-20.00.injur 2020	Accident_car_20.01-24.00.injur 2020	Accident_car.fatal 2019	Accident_car_00.01-04.00.fatal 2019	Accident_car_04.01-08.00.fatal 2019	Accident_car_08.01-12.00.fatal 2019	Accident_car_12.01-16.00.fatal 2019	Accident_car_16.01-20.00.fatal 2019	Accident_car_20.01-24.00.fatal 2019	Accident_car.fatal 2020	Accident_car_00.01-04.00.fatal 2020	Accident_car_04.01-08.00.fatal 2020	Accident_car_08.01-12.00.fatal 2020	Accident_car_12.01-16.00.fatal 2020	Accident_car_16.01-20.00.fatal 2020	Accident_car_20.01-24.00.fatal 2020
1	01Jan-05Jan	01Jan-04Jan			672	96	85	121	147	139	84	568	76	70	113	130	115	64	635	109	68	96	156	135	71	639	74	95	122	145	142	61	87	16	18	12	15	12	14	72	17	11	9	11	13	11
2	06Jan-12Jan	05Jan-11Jan			356	45	53	61	82	71	44	361	44	52	71	66	82	46	304	76	30	45	72	42	39	332	27	79	52	77	73	24	53	13	6	3	9	15	7	67	5	7	13	20	10	12
3	13Jan-19Jan	12Jan-18Jan			333	45	52	63	56	69	48	394	42	53	77	84	74	64	251	24	31	43	56	60	37	328	28	25	88	75	59	53	55	6	8	6	5	21	9	59	3	9	10	6	21	10
4	20Jan-26Jan	19Jan-25Jan			293	35	47	59	61	45	46	414	47	58	85	80	96	48	241	22	31	30	56	53	49	323	30	41	76	65	84	27	60	10	7	7	14	11	11	67	4	10	10	13	19	11
5	27Jan-02Feb	26Jan-01Feb			342	49	49	58	55	69	62	396	54	64	72	78	69	59	285	44	63	35	44	45	54	308	53	37	46	55	80	37	54	10	5	10	7	13	9	61	9	8	8	6	20	10
6	03Feb-09Feb	02Feb-08Feb			318	47	38	65	54	59	55	383	67	63	61	58	78	56	206	35	33	30	35	24	49	288	52	65	34	41	70	26	55	7	8	8	5	8	19	65	14	11	2	8	14	16
7	10Feb-16Feb	09Feb-15Feb			332	43	48	72	72	53	44	392	48	46	88	79	72	59	262	39	40	50	44	47	42	294	27	43	60	69	51	44	44	8	4	3	9	11	9	55	8	7	8	5	16	11
8	17Feb-23Feb	16Feb-22Feb			327	32	37	50	77	86	45	436	41	68	99	95	78	55	267	27	39	39	59	77	26	337	28	59	66	72	74	38	38	3	4	7	5	10	9	83	9	17	17	12	19	9
9	24Feb-02Mar	23Feb-29Feb	Announced as a dangerous	2020-02-26	330	55	51	60	51	67	46	380	37	53	86	77	68	59	241	42	40	50	26	56	27	412	20	42	107	92	92	59	53	7	9	12	7	11	7	48	6	4	9	9	7	13
10	03Mar-09Mar	01Mar-07Mar	communicable disease		330	42	51	75	65	55	42	493	52	72	102	99	92	76	294	40	54	75	41	56	28	378	51	39	72	76	72	68	39	10	7	11	3	5	3	80	6	17	9	12	25	11
11	10Mar-16Mar	08Mar-14Mar			373	53	64	78	69	63	46	390	47	52	78	71	73	69	301	34	56	62	46	59	44	295	30	52	48	65	64	36	40	5	7	6	8	10	4	58	7	9	12	7	8	15
12	17Mar-23Mar	15Mar-21Mar	Bangkok's lockdown	2020-03-22	323	41	41	62	63	69	47	413	41	73	76	101	69	53	287	44	47	56	61	50	29	292	19	53	43	66	75	36	52	8	9	11	1	13	10	55	5	13	12	7	11	7
13	24Mar-30Mar	22Mar-28Mar	Thailand's emergency decree	2020-03-26	367	39	60	75	88	53	52	301	41	38	58	61	65	38	327	30	52	59	82	44	60	210	21	53	24	50	40	22	53	4	6	11	10	12	10	48	9	7	5	8	9	10
14	31Mar-06Apr	29Mar-04Apr	Nationwide curfew	2020-04-03	337	46	48	56	84	63	40	265	23	38	45	60	61	38	248	28	38	49	60	34	39	150	20	11	22	37	38	22	36	4	9	7	5	5	6	32	2	6	2	4	11	7
15	07Apr-13Apr	05Apr-11Apr			977	110	118	177	172	233	167	308	5	36	73	65	78	51	1014	126	149	171	175	243	150	209	3	25	57	35	61	28	158	32	18	23	22	26	37	36	1	3	11	2	14	5
16	14Apr-20Apr	12Apr-18Apr	Songkran's festival period		939	115	82	156	228	208	150	485	22	47	90	120	130	76	973	106	94	169	225	239	140	341	13	35	58	78	105	52	132	16	15	13	19	39	30	66	3	3	13	11	23	13
17	21Apr-27Apr	19Apr-25Apr			325	50	40	72	62	69	32	287	9	43	41	83	68	43	261	72	25	42	47	53	22	182	6	26	25	56	38	31	46	7	4	12	7	10	6	27	1	2	3	4	10	7
18	28Apr-04May	26Apr-02May			292	33	48	52	54	70	35	297	11	39	75	60	67	45	286	32	46	60	47	72	29	194	9	24	35	35	56	35	60	5	16	6	1	19	13	40	2	7	4	6	10	11
19	05May-11May	03May-09May	First phase easing	2020-05-03	331	44	37	35	78	78	59	304	13	32	72	73	61	53	375	66	48	33	86	98	44	219	10	27	54	48	48	32	35	7	2	3	9	5	9	46	1	4	10	9	11	11
20	12May-18May	10May-16May			305	31	49	61	68	54	42	327	4	45	67	68	88	55	243	18	60	47	45	43	30	238	1	29	61	55	69	23	42	3	15	6	6	6	6	51	0	6	16	10	9	9
21	19May-25May	17May-23May	Second phase easing	2020-05-17	311	39	38	60	65	53	56	337	10	37	64	84	83	59	225	24	37	49	42	44	29	227	8	17	43	56	67	36	36	6	2	5	6	7	10	47	1	7	11	11	6	11
22	26May-01Jun	24May-30May			243	34	51	42	51	37	28	349	19	38	67	80	90	55	199	15	30	38	47	23	46	219	16	19	60	49	55	20	22	0	4	2	4	5	6	50	1	1	9	12	15	12
23	02Jun-08Jun	31May-06Jun	Third phase easing	2020-06-01	290	48	56	53	52	49	32	345	17	46	50	86	83	63	214	55	33	45	32	30	19	235	8	20	32	77	63	35	40	16	6	7	4	4	3	41	2	5	7	13	9	5
24	09Jun-15Jun	07Jun-13Jun			311	41	40	74	59	61	36	301	15	32	59	64	69	62	230	34	27	53	48	45	23	192	9	21	29	42	51	40	35	4	5	8	8	9	1	35	4	4	6	5	8	8
25	16Jun-22Jun	14Jun-20Jun	Fourth phase easing	2020-06-15	274	32	42	47	63	63	27	408	29	54	88	104	71	62	226	26	29	52	48	57	14	243	21	23	45	70	36	48	32	5	3	3	5	13	3	48	2	5	4	11	21	5
26	23Jun-29Jun	21Jun-27Jun			271	39	44	46	54	52	36	363	37	49	73	75	69	60	220	16	32	27	90	32	23	265	20	39	61	67	49	29	30	5	2	5	5	7	6	57	6	9	8	13	15	6
27	30Jun-06Jul	28Jun-04Jul	Fifth phase easing	2020-07-01	382	42	55	83	76	79	47	425	45	55	82	91	82	70	272	31	42	42	50	64	43	346	27	45	62	65	82	65	55	11	5	5	8	10	16	60	7	12	6	12	15	8
28	07Jul-13Jul	05Jul-11Jul			300	35	45	53	68	45	54	487	47	56	101	113	98	72	239	13	28	24	46	93	35	395	42	53	73	85	91	51	34	7	5	6	3	10	3	69	8	4	16	8	14	19
29	14Jul-20Jul	12Jul-18Jul			258	26	29	53	51	69	30	346	46	43	74	63	68	52	272	17	22	79	47	85	22	251	37	38	52	39	48	37	33	3	4	11	3	4	8	46	12	6	9	7	5	7
30	21Jul-27Jul	19Jul-25Jul			311	38	48	64	73	51	37	440	55	52	64	95	106	68	212	26	26	50	43	43	24	323	42	30	55	83	63	50	35	2	6	5	8	6	8	63	8	10	8	7	12	18
31	28Jul-03Aug	26Jul-01Aug			299	39	48	62	61	44	45	509	66	60	103	116	95	69	177	19	26	34	40	27	31	375	42	62	60	78	87	46	49	9	7	5	8	11	9	74	18	14	11	13	11	7
32	04Aug-10Aug	02Aug-08Aug			384	49	58	78	66	87	46	385	53	46	79	60	65	82	350	36	83	81	43	88	19	271	41	34	44	27	60	65	39	9	7	3	2	10	8	51	9	2	14	5	8	13
33	11Aug-17Aug	09Aug-15Aug			294	34	47	45	65	64	39	366	50	61	60	65	72	58	207	19	38	29	59	31	31	275	34	68	40	50	57	26	40	2	6	3	12	9	8	52	6	13	4	10	12	7
34	18Aug-24Aug	16Aug-22Aug			280	37	35	56	49	62	41	344	38	52	64	60	76	54	226	23	25	30	63	58	27	212	20	28	37	30	51	46	57	8	15	8	7	5	14	57	3	9	7	10	16	12
35	25Aug-31Aug	23Aug-29Aug			326	50	55	65	42	60	54	316	43	47	51	77	51	47	253	37	35	43	63	45	30	236	30	36	32	74	38	26	41	5	6	8	9	4	9	53	12	6	6	9	10	10
36	1Sep-7Sep	30Aug-05Sep			264	36	35	54	47	46	46	472	52	59	104	112	89	56	180	24	49	19	26	32	30	390	38	48	84	87	95	38	28	4	2	4	2	8	8	65	8	10	13	16	9	9
37	8Sep-14Sep	06Sep-12Sep			253	34	37	34	40	60	48	509	63	69	105	98	97	77	193	28	24	19	44	43	35	364	37	60	64	60	80	63	40	6	3	7	3	11	10	55	10	10	7	8	10	10
38	15Sep-21Sep	13Sep-19Sep			315	42	40	61	54	61	57	476	71	73	76	83	92	81	236	39	34	40	41	55	27	298	42	54	24	52	70	56	36	5	6	3	7	7	8	67	10	10	10	9	14	12
39	22Sep-28Sep	20Sep-26Sep			266	30	40	49	54	46	47	344	48	58	68	67	52	51	174	18	24	24	27	43	38	262	70	38	30	43	34	47	24	3	2	3	6	5	5	59	17	10	8	2	10	12
40	29Sep-05Oct	27Sep-03Oct			271	31	34	47	56	61	42	419	49	55	81	79	76	79	180	15	33	34	42	31	25	282	29	73	55	39	49	37	56	18	5	7	9	7	10	59	7	4	9	16	8	15
41	06Oct-12Oct	04Oct-10Oct			336	33	46	57	74	73	53	481	67	76	75	96	95	72	299	37	35	60	60	66	41	266	26	50	33	66	48	43	64	12	10	6	8	12	16	74	17	9	9	12	17	10
42	13Oct-19Oct	11Oct-17Oct			375	44	67	79	80	58	47	398	54	46	74	73	81	70	286	31	87	43	75	28	22	337	38	41	108	37	66	47	74	12	16	12	8	17	9	64	5	1	23	4	12	19
43	20Oct-26Oct	18Oct-24Oct			351	55	55	48	83	59	51	365	54	57	69	46	79	60	260	40	39	28	88	40	25	286	38	63	39	27	69	50	54	10	11	9	7	9	8	52	11	10	8	2	11	10
44	27Oct-02Nov	25Oct-31Oct			374	62	68	65	69	54	56	415	63	56	75	73	69	79	257	41	56	48	37	34	41	315	32	50	39	51	64	79	69	10	9	6	15	14	15	60	11	3	10	12	11	13
45	03Nov-09Nov	01Nov-07Nov			311	27	40	62	56	69	57	347	46	56	73	57	70	45	201	14	17	56	44	51	19	251	36	35	52	32	60	36	60	2	6	9	9	26	8	51	8	3	13	7	15	5
46	10Nov-16Nov	08Nov-14Nov			335	56	49	46	68	73	43	353	52	46	64	76	67	48	279	32	72	18	80	50	27	237	25	27	51	46	60	28	68	5	12	7	16	22	6	43	8	3	5	8	12	7
47	17Nov-23Nov	15Nov-21Nov			336	44	68	55	66	55	48	573	64	70	113	130	113	83	287	34	56	93	44	37	23	485	55	70	76	97	88	99	59	5	13	9	9	11	12	89	13	14	18	15	14	15
48	24Nov-30Nov	22Nov-28Nov			329	47	52	60	55	74	41	484	69	71	113	81	93	57	278	41	46	50	42	40	59	427	68	35	82	93	106	43	59	7	6	9	5	20	12	72	10	6	14	11	19	12
49	01Dec-07Dec	29Nov-05Dec			307	42	44	74	53	48	46	346	53	43	56	67	82	45	261	35	41	66	27	55	37	307	53	48	35	57	81	33	50	5	7	11	5	13	9	56	11	10	4	6	17	8
50	08Dec-14Dec	06Dec-12Dec			338	52	43	60	71	59	53	506	75	50	103	95	100	83	310	45	48	36	53	96	32	426	55	42	83	72	116	58	68	7	9	7	18	16	11	80	10	12	10	11	13	24
51	15Dec-21Dec	13Dec-19Dec			309	40	41	52	66	59	51	465	66	61	87	97	105	49	227	23	36	22	66	39	41	443	92	38	89	89	92	43	67	12	14	7	12	7	15	58	8	11	18	3	13	5
52	22Dec-28Dec	20Dec-26Dec			889	108	93	149	179	216	144	351	42	58	65	62	76	48	863	88	101	159	170	224	121	254	29	30	57	38	66	34	131	15	18	20	23	30	25	58	10	5	8	9	14	12
53	29Dec-31Dec	27Dec-31Dec			880	102	92	155	188	200	143	968	111	92	139	196	252	178	1011	97	121	168	215	266	144	921	84	80	131	213	262	151	85	17	5	10	11	20	22	156	20	15	17	30	33	41
Retrived	2021-01-18	12:36:00

## Sheet: Suicidal behavior
Weeks	Week 2019	Week 2020	Attempt 2019	Suicide 2019	Attempt 2020	Suicide 2020		Retrived data
1	01Jan-05Jan	01Jan-04Jan	111	32	154	80		2021-01-13	09:50:00
2	06Jan-12Jan	05Jan-11Jan	141	31	262	115
3	13Jan-19Jan	12Jan-18Jan	139	37	248	104
4	20Jan-26Jan	19Jan-25Jan	110	43	270	94
5	27Jan-02Feb	26Jan-01Feb	101	41	232	69
6	03Feb-09Feb	02Feb-08Feb	154	40	252	99
7	10Feb-16Feb	09Feb-15Feb	139	41	242	94
8	17Feb-23Feb	16Feb-22Feb	125	39	256	108
9	24Feb-02Mar	23Feb-29Feb	133	33	248	106
10	03Mar-09Mar	01Mar-07Mar	135	33	234	103
11	10Mar-16Mar	08Mar-14Mar	130	38	253	100
12	17Mar-23Mar	15Mar-21Mar	152	36	239	112
13	24Mar-30Mar	22Mar-28Mar	119	31	164	74
14	31Mar-06Apr	29Mar-04Apr	125	42	205	93
15	07Apr-13Apr	05Apr-11Apr	102	34	215	79
16	14Apr-20Apr	12Apr-18Apr	165	46	183	107
17	21Apr-27Apr	19Apr-25Apr	119	25	191	93
18	28Apr-04May	26Apr-02May	114	31	184	71
19	05May-11May	03May-09May	113	26	240	83
20	12May-18May	10May-16May	126	35	230	68
21	19May-25May	17May-23May	132	26	194	90
22	26May-01Jun	24May-30May	124	30	209	89
23	02Jun-08Jun	31May-06Jun	139	35	229	96
24	09Jun-15Jun	07Jun-13Jun	116	36	180	133
25	16Jun-22Jun	14Jun-20Jun	108	40	177	60
26	23Jun-29Jun	21Jun-27Jun	117	27	191	90
27	30Jun-06Jul	28Jun-04Jul	116	29	207	79
28	07Jul-13Jul	05Jul-11Jul	93	32	184	82
29	14Jul-20Jul	12Jul-18Jul	85	28	192	74
30	21Jul-27Jul	19Jul-25Jul	90	18	188	54
31	28Jul-03Aug	26Jul-01Aug	92	26	185	64
32	04Aug-10Aug	02Aug-08Aug	95	37	177	74
33	11Aug-17Aug	09Aug-15Aug	117	35	171	68
34	18Aug-24Aug	16Aug-22Aug	126	39	189	64
35	25Aug-31Aug	23Aug-29Aug	102	29	153	68
36	1Sep-7Sep	30Aug-05Sep	99	37	164	66
37	8Sep-14Sep	06Sep-12Sep	115	29	162	62
38	15Sep-21Sep	13Sep-19Sep	138	33	184	65
39	22Sep-28Sep	20Sep-26Sep	128	34	138	56
40	29Sep-05Oct	27Sep-03Oct	250	96	172	69
41	06Oct-12Oct	04Oct-10Oct	281	87	174	62
42	13Oct-19Oct	11Oct-17Oct	261	91	241	54
43	20Oct-26Oct	18Oct-24Oct	237	109	152	48
44	27Oct-02Nov	25Oct-31Oct	270	100	173	59
45	03Nov-09Nov	01Nov-07Nov	286	83	178	78
46	10Nov-16Nov	08Nov-14Nov	271	94	116	48
47	17Nov-23Nov	15Nov-21Nov	272	65	123	51
48	24Nov-30Nov	22Nov-28Nov	265	90	156	53
49	01Dec-07Dec	29Nov-05Dec	210	91	138	37
50	08Dec-14Dec	06Dec-12Dec	256	86	94	45
51	15Dec-21Dec	13Dec-19Dec	261	96	138	54
52	22Dec-28Dec	20Dec-26Dec	215	85	107	44
53	29Dec-31Dec	27Dec-31Dec	78	33	68	34
